# Supplementary material for: Should We Reconsider the Necessity of a Refinement of Prostate Cancer Risk Classification and Radiotherapy Treatment Strategy? Experiences from a Retrospective Analysis of Data from a Single Institution
Source: PubMed Central journal article supplement (PMC7795563; doi:10.3390/jcm10010110), 2020-12-30
Supplement: jcm-10-00110-s001.pdf [file jcm-10-00110-s001.pdf]

**Supplementary Table 1.** Properties of explanatory variables in the three risk groups respectively.

| Explanatory variables                   | Risk         | Median (25%;75%)       | Interquartile range | Minimum | Maximum | Skewness (Std. Error) | Kurtosis (Std. Error) |
|-----------------------------------------|--------------|------------------------|---------------------|---------|---------|-----------------------|-----------------------|
| <b>Delivered dose</b>                   | low          | 74.00<br>(74.00;87.00) | 4.00                | 74.00   | 81.00   | 1.262 (0.403)         | 0.348 (0.788)         |
|                                         | intermediate | 78.00<br>(78.00;78.00) | 0.00                | 73.20   | 81.00   | -0.517 (0.414)        | 3.435 (0.809)         |
|                                         | high         | 81.00<br>(74.40;81.00) | 3.60                | 73.50   | 81.00   | -1.002 (0.414)        | 0.179 (0.809)         |
| <b>Plan accuracy (%)</b>                | low          | 98.78<br>(97.87;99.25) | 1.38                | 96.05   | 100.00  | -0.784 (0.403)        | 0.105 (0.788)         |
|                                         | intermediate | 98.57<br>(97.87;99.32) | 1.44                | 94.24   | 99.99   | -1.438 (0.414)        | 2.124 (0.809)         |
|                                         | high         | 97.95<br>(96.94;99.03) | 2.12                | 92.12   | 99.50   | -1.606 (0.414)        | 3.087 (0.809)         |
| <b>ADT duration (months)</b>            | low          | 6.0<br>(2.25;8.5)      | 6                   | 0       | 60      | 3.239 (0.403)         | 12.711 (0.788)        |
|                                         | intermediate | 22.0<br>(6;7.5)        | 30                  | 6       | 60      | 0.685 (0.4149)        | -0.735 (0.809)        |
|                                         | high         | 36.0<br>(24.0;57.0)    | 33                  | 6       | 120     | 1.376 (0.4149)        | 4.125 (0.809)         |
| <b>Time to reach PSA nadir (months)</b> | low          | 10.00<br>(5.00;26.00)  | 21                  | 1       | 48      | 0.845 (0.403)         | -0.284 (0.788)        |
|                                         | intermediate | 13.00<br>(7.25;15.00)  | 8                   | 1       | 35      | 0.724 (0.414)         | 1.358 (0.809)         |
|                                         | high         | 14.00<br>(8.00;18.00)  | 10                  | 2       | 28      | 0.169 (0.412)         | -0.779 (0.821)        |

**Supplementary Table 2.** Model summary of binary logistic regression (backward stepwise - likelihood ratio)

| <b>Model summary</b> |                                                                                                   |             |                            |
|----------------------|---------------------------------------------------------------------------------------------------|-------------|----------------------------|
| <b>Model</b>         | <b>Chi-square</b>                                                                                 | <b>Sig.</b> | <b>Nagelkerke R square</b> |
| 1                    | 7.492                                                                                             | 0.278       | 0.146                      |
| 2                    | 0.000                                                                                             | 0.995       | 0.146                      |
| 3                    | -0.145                                                                                            | 0.703       | 0.143                      |
| 4                    | -0.300                                                                                            | 0.584       | 0.138                      |
| 5                    | -0.771                                                                                            | 0.380       | 0.123                      |
| Step 1               | Variables: (Constant), Delivered dose, Plan accuracy, Risk, ADT duration, Time to reach PSA nadir |             |                            |
| Step 2               | Variables: (Constant), Delivered dose, Plan accuracy, Risk, ADT duration                          |             |                            |
| Step 3               | Variables: (Constant), Plan accuracy, Risk, ADT duration                                          |             |                            |
| Step 4               | Variables: (Constant), Plan accuracy, Risk                                                        |             |                            |
| Step 5               | Variables: (Constant), Risk                                                                       |             |                            |

**Supplementary Table 3.** Properties of explanatory variables in the four risk groups reclassified by the ISUP recommendations

| Explanatory variables                   | Risk           | Median                 | Interquartile range | Minimum | Maximum | Skewness (Std. Error) | Kurtosis (Std. Error) |
|-----------------------------------------|----------------|------------------------|---------------------|---------|---------|-----------------------|-----------------------|
| <b>Delivered dose</b>                   | low            | 74.00<br>(74.00;87.00) | 4.00                | 74.00   | 81.00   | 1.262 (0.403)         | 0.348 (0.788)         |
|                                         | intermediate 1 | 78.00<br>(78.00;78.00) | 0.00                | 73.20   | 81.00   | -0.592 (0.472)        | 3.227 (0.918)         |
|                                         | intermediate 2 | 78.00<br>(77.00;78.00) | 1.00                | 76.00   | 81.00   | 0.872 (0.717)         | 2.589 (1.400)         |
|                                         | high           | 81.00<br>(74.40;81.00) | 3.60                | 73.50   | 81.00   | -1.002 (0.414)        | 0.179 (0.809)         |
| <b>Plan accuracy (%)</b>                | low            | 98.78<br>(97.87;99.25) | 1.38                | 96.05   | 100.00  | -0.784 (0.403)        | 0.105 (0.788)         |
|                                         | intermediate 1 | 98.64<br>(97.99;99.32) | 1.33                | 95.34   | 99.87   | -1.252 (0.472)        | 1.26 (0.918)          |
|                                         | intermediate 2 | 98.51<br>(97.35;99.44) | 2.07                | 94.24   | 99.99   | -1.370 (0.717)        | 2.601 (1.400)         |
|                                         | high           | 97.95<br>(96.94;99.03) | 2.12                | 92.12   | 99.50   | -1.606 (0.414)        | 3.087 (0.809)         |
| <b>ADT duration (months)</b>            | low            | 6.0<br>(2.25;8.5)      | 6                   | 0       | 60      | 3.239 (0.403)         | 12.711 (0.788)        |
|                                         | intermediate 1 | 19.5<br>(6.0;36.0)     | 30                  | 6       | 60      | 0.658 (0.472)         | -0.596 (0.918)        |
|                                         | intermediate 2 | 30.0<br>(12.0;60.0)    | 48                  | 6       | 60      | -0.015 (0.717)        | -2.220 (1.400)        |
|                                         | high           | 36.0<br>(24.0;57.0)    | 33                  | 6       | 120     | 1.376 (0.4149)        | 4.125 (0.809)         |
| <b>Time to reach PSA nadir (months)</b> | low            | 10.0<br>(5.0;26.0)     | 21                  | 1       | 48      | 0.845 (0.403)         | -0.284 (0.788)        |
|                                         | intermediate 1 | 13.5<br>(5.0;26.0)     | 8                   | 2       | 35      | 0.852 (0.472)         | 1.813 (0.918)         |
|                                         | intermediate 2 | 13.0<br>(4.5;16.0)     | 12                  | 1       | 24      | 0.034 (0.717)         | -0.301 (1.400)        |
|                                         | high           | 14.0<br>(8.0;18.0)     | 10                  | 2       | 28      | 0.169 (0.412)         | -0.779 (0.821)        |
